# Supplementary material for: Premature Discontinuation of Prospective Clinical Studies Approved by a Research Ethics Committee – A Comparison of Randomised and Non-Randomised Studies
Source: PubMed Central journal article supplement (PMC5085068; doi:10.1371/journal.pone.0165605), 2016-10-28
Supplement: pone.0165605.s001.pdf [file pone.0165605.s001.pdf]

## S1 Appendix

### Standardized Survey Questionnaire (RECs Switzerland and Canada)

#### Trial status

1. WAS THE TRIAL STARTED AT ALL?

YES  NO  UNKNOWN

- If NO, check the appropriate box (← applies only to **multicenter** studies ):

- *Whole study* was not started
- Not started only in *your center*

2. IS THE TRIAL STILL RUNNING?

YES  NO  UNKNOWN

- IF YES (Check all that apply):

- Recruitment not completed yet
- Recruitment completed
- Data collection completed

If the **trial is still running**, the **questionnaire is completed** for you.

If the **trial is NOT running anymore**, **please proceed** with this questionnaire.

3. HAS THE TRIAL BEEN DISCONTINUED PREMATURELY?

YES  NO  UNKNOWN

- If YES (Check all that apply):

- Stopped because of slow recruitment
- Stopped for harm
- Stopped for benefit
- Stopped because of evidence from other trials
- Stopped for futility
- Other reason (please specify)

Specification/comments: \_\_\_\_\_

**Publication status of the trial**

4. HAVE THE RESULTS OF THIS TRIAL BEEN PUBLISHED?

YES       NO       UNKNOWN

If YES, what was the type of the publication (CHECK ALL THAT APPLY)

- Publication in **Journal**
- **Abstract** presentation at conference
- **Internet Report**
- **Other form** (please specify below)

PLEASE GIVE ALL REFERENCES OF THE PUBLICATION WITH **NAME OF THE FIRST AUTHOR, TITLE OF THE PUBLICATION, NAME OF THE JOURNAL/ CONFERENCE/OTHER FORM AND PUBLICATION YEAR.**  
FOR **INTERNET PUBLICATIONS** PLEASE PROVIDE THE **WEBADDRESS:**

---

---

---

---

## Standardized Survey Questionnaire (REC Freiburg, Germany)

Antragsteller:

Titel des Projekts:

Antrag Nummer:

Aktueller Stand der Studie:

Diese Studie

- wurde gemäß Protokoll abgeschlossen
- wurde vorzeitig beendet. Grund: .....
- wurde nicht begonnen:  als ganze Studie
  - nur in Ihrem Zentrum
- läuft noch:  Rekrutierung abgeschlossen
  - Datensammlung abgeschlossen
  - vorläufig publiziert (bitte Referenz unten angeben)

Bitte bestätigen Sie für jede der folgenden Publikationen, ob sie dem oben genannten Projekt zuzuordnen ist:

1.) .....

2.) .....

Bitte geben Sie die Referenzen (Autoren, Titel, Zeitschrift, Band, Seitenzahl) weiterer Publikationen an. Bitte evtl. Zusatzblatt benutzen.

Originalarbeiten:

1.: .....

2.: ..... etc.

2. Abstracts und Buchbeiträge:

1.: .....

2.: ..... etc.
